# Supplementary material for: Implementation of the ISORROPIA-lite aerosol thermodynamics model into the EMAC chemistry climate model (based on MESSy v2.55): implications for aerosol composition and acidity
Source: Copernicus journal article supplement (doi:10.5194/gmd-17-1111-2024), 2024-02-12
Supplement: Supplementary file 1 [file gmd-17-1111-2024-supplement.pdf]

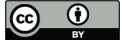

*Supplement of*

**Implementation of the ISORROPIA-lite aerosol thermodynamics model into the EMAC chemistry climate model (based on MESSy v2.55): implications for aerosol composition and acidity**

**Alexandros Milousis et al.**

*Correspondence to:* Vlassis A. Karydis (v.karydis@fz-juelich.de)

The copyright of individual parts of the supplement might differ from the article licence.

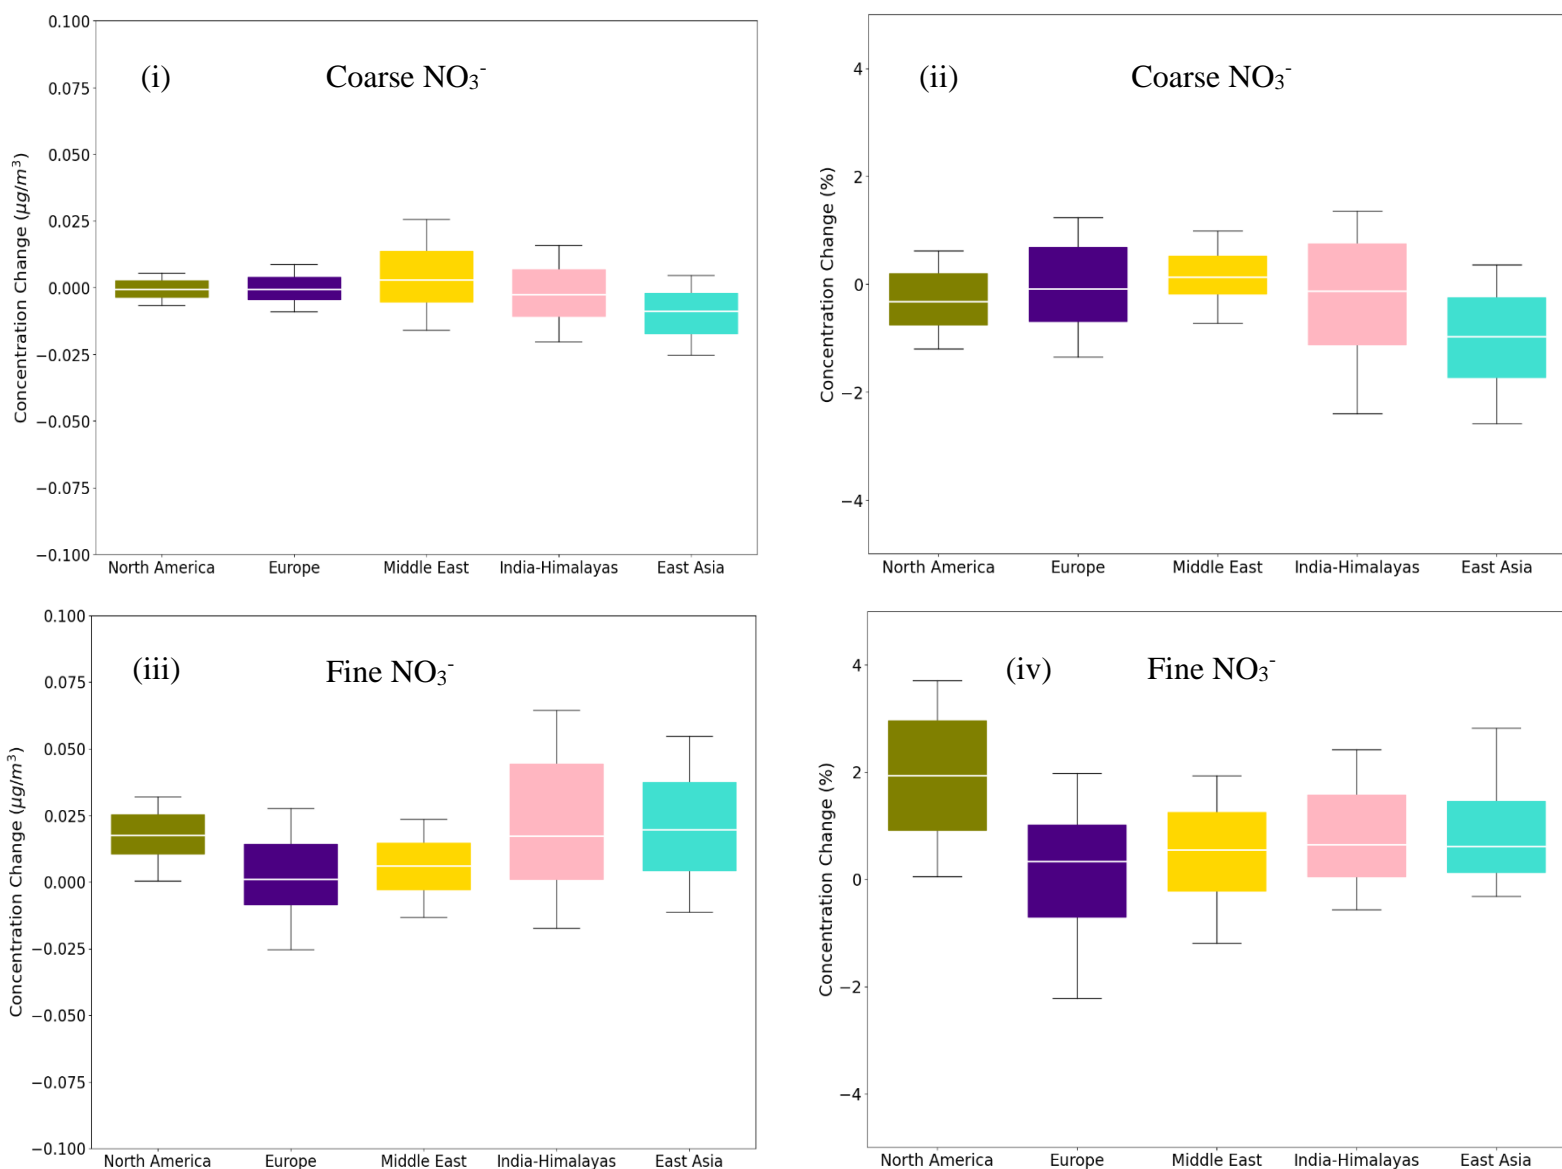

**Figure S1:** Bar chart plots depicting the 25<sup>th</sup>, 50<sup>th</sup> and 75<sup>th</sup> percentiles (box) of the difference in the global daily mean surface concentrations of i) coarse and ii) fine aerosol  $\text{NO}_3^-$  for the regions of North America, Europe, Middle East, India-Himalayas and East Asia, as predicted by EMAC using ISORROPIA II v1 and ISORROPIA II v2.3. The fractional differences in global daily mean surface concentrations of iii) coarse and iv) fine aerosol  $\text{NO}_3^-$  for the same regions are also shown. Both models assume that the aerosol is at its stable state at low RH and a positive change corresponds to higher concentrations by ISORROPIA II v1.

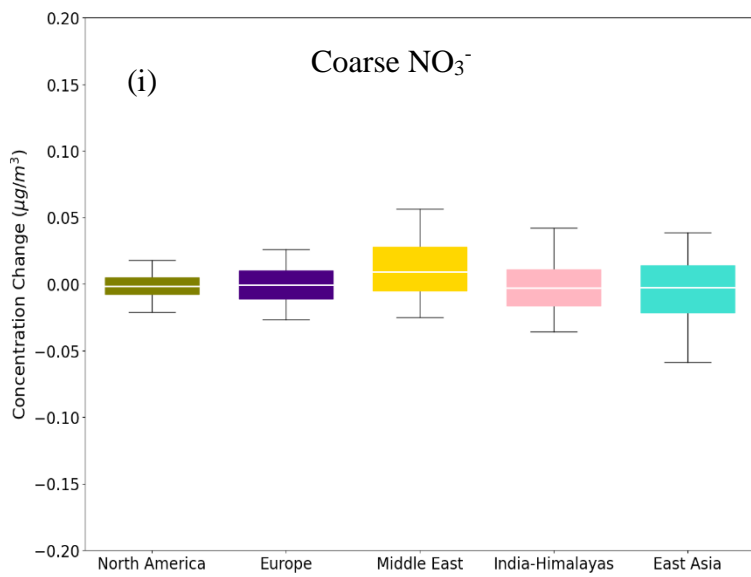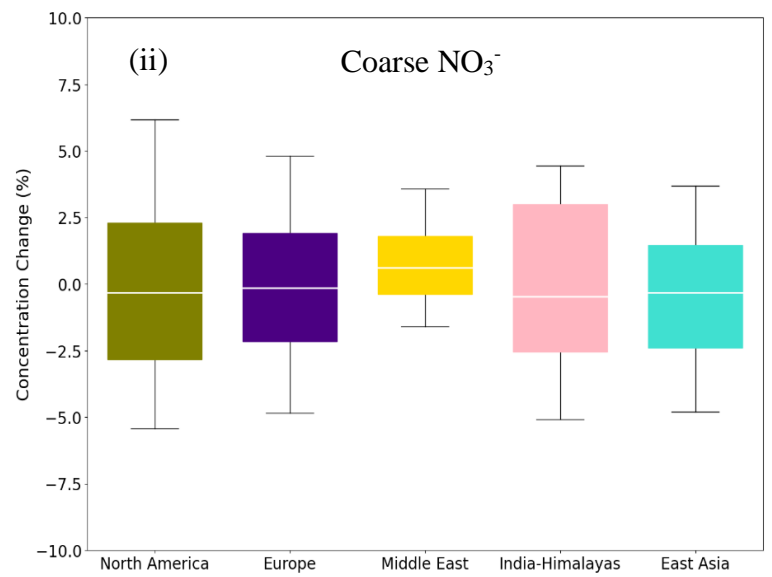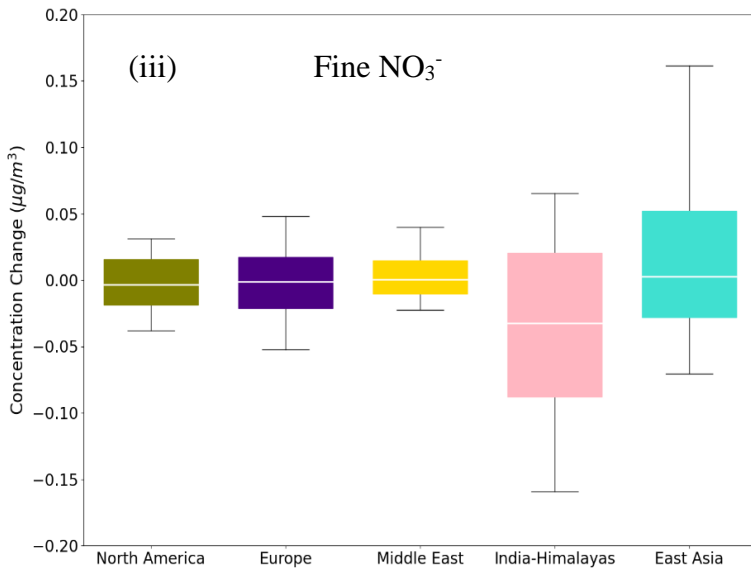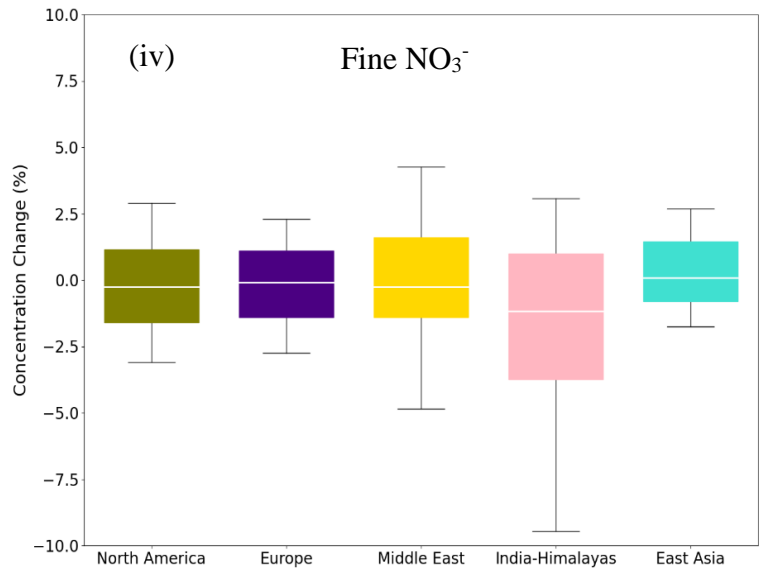

**Figure S2:** Bar chart plots depicting the 25<sup>th</sup>, 50<sup>th</sup> and 75<sup>th</sup> percentiles (box) of the difference in the global daily mean surface concentrations of i) coarse and ii) fine aerosol  $\text{NO}_3^-$  for the regions of North America, Europe, Middle East, India-Himalayas and East Asia, as predicted by EMAC using ISORROPIA-lite and ISORROPIA II. The fractional differences in global daily mean surface concentrations of iii) coarse and iv) fine aerosol  $\text{NO}_3^-$  for the same regions are also shown. Both models assume that the aerosol is at its metastable state at low RH and a positive change corresponds to higher concentrations by ISORROPIA-lite.

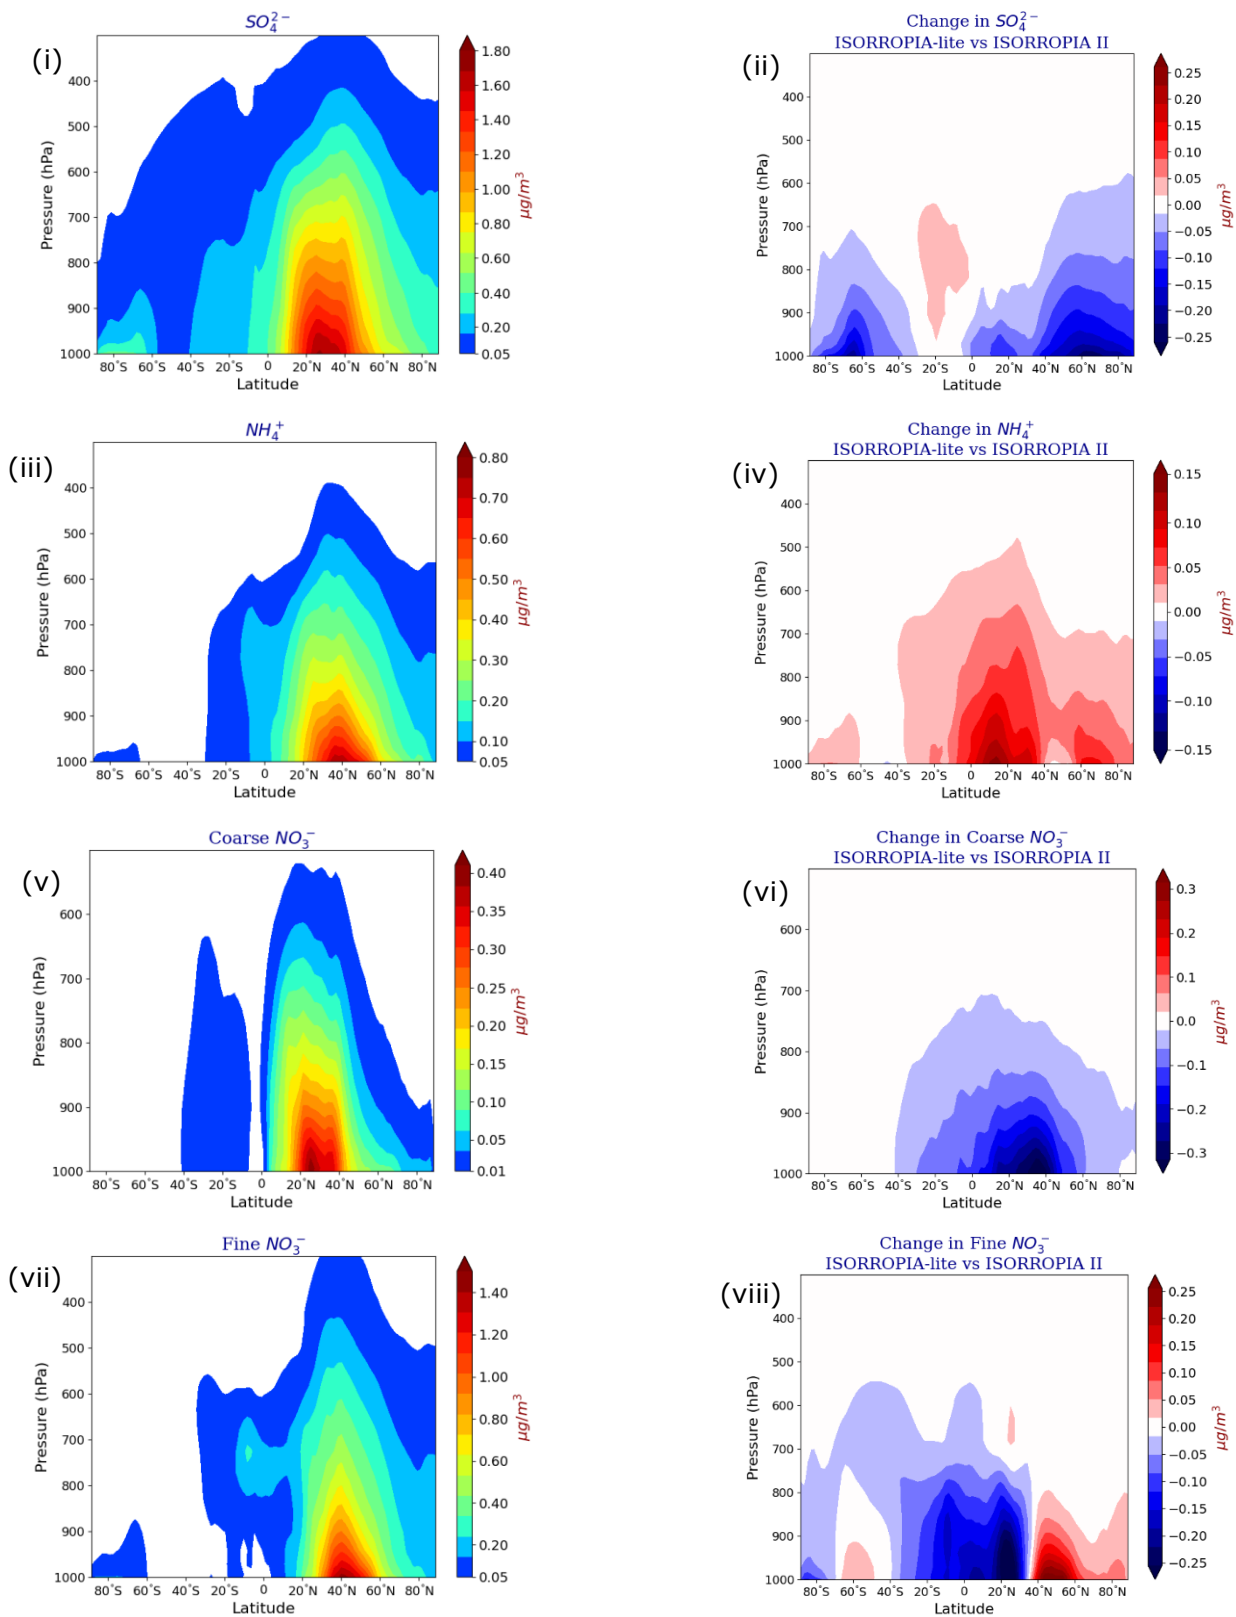

**Figure S3 :** Annually averaged zonal concentrations of i)  $SO_4^{2-}$  and ii)  $NH_4^+$  in TSP, iii) coarse and iv) fine aerosol  $NO_3^-$  as predicted by EMAC using ISORROPIA-lite. Change of the annually averaged EMAC-simulated zonal concentration of v)  $NH_4^+$  and vi)  $SO_4^{2-}$  in TSP, vii) coarse and viii) fine aerosol  $NO_3^-$  after employing ISORROPIA II. Positive values in red indicate higher concentrations by ISORROPIA-lite. The models assume different aerosol states.

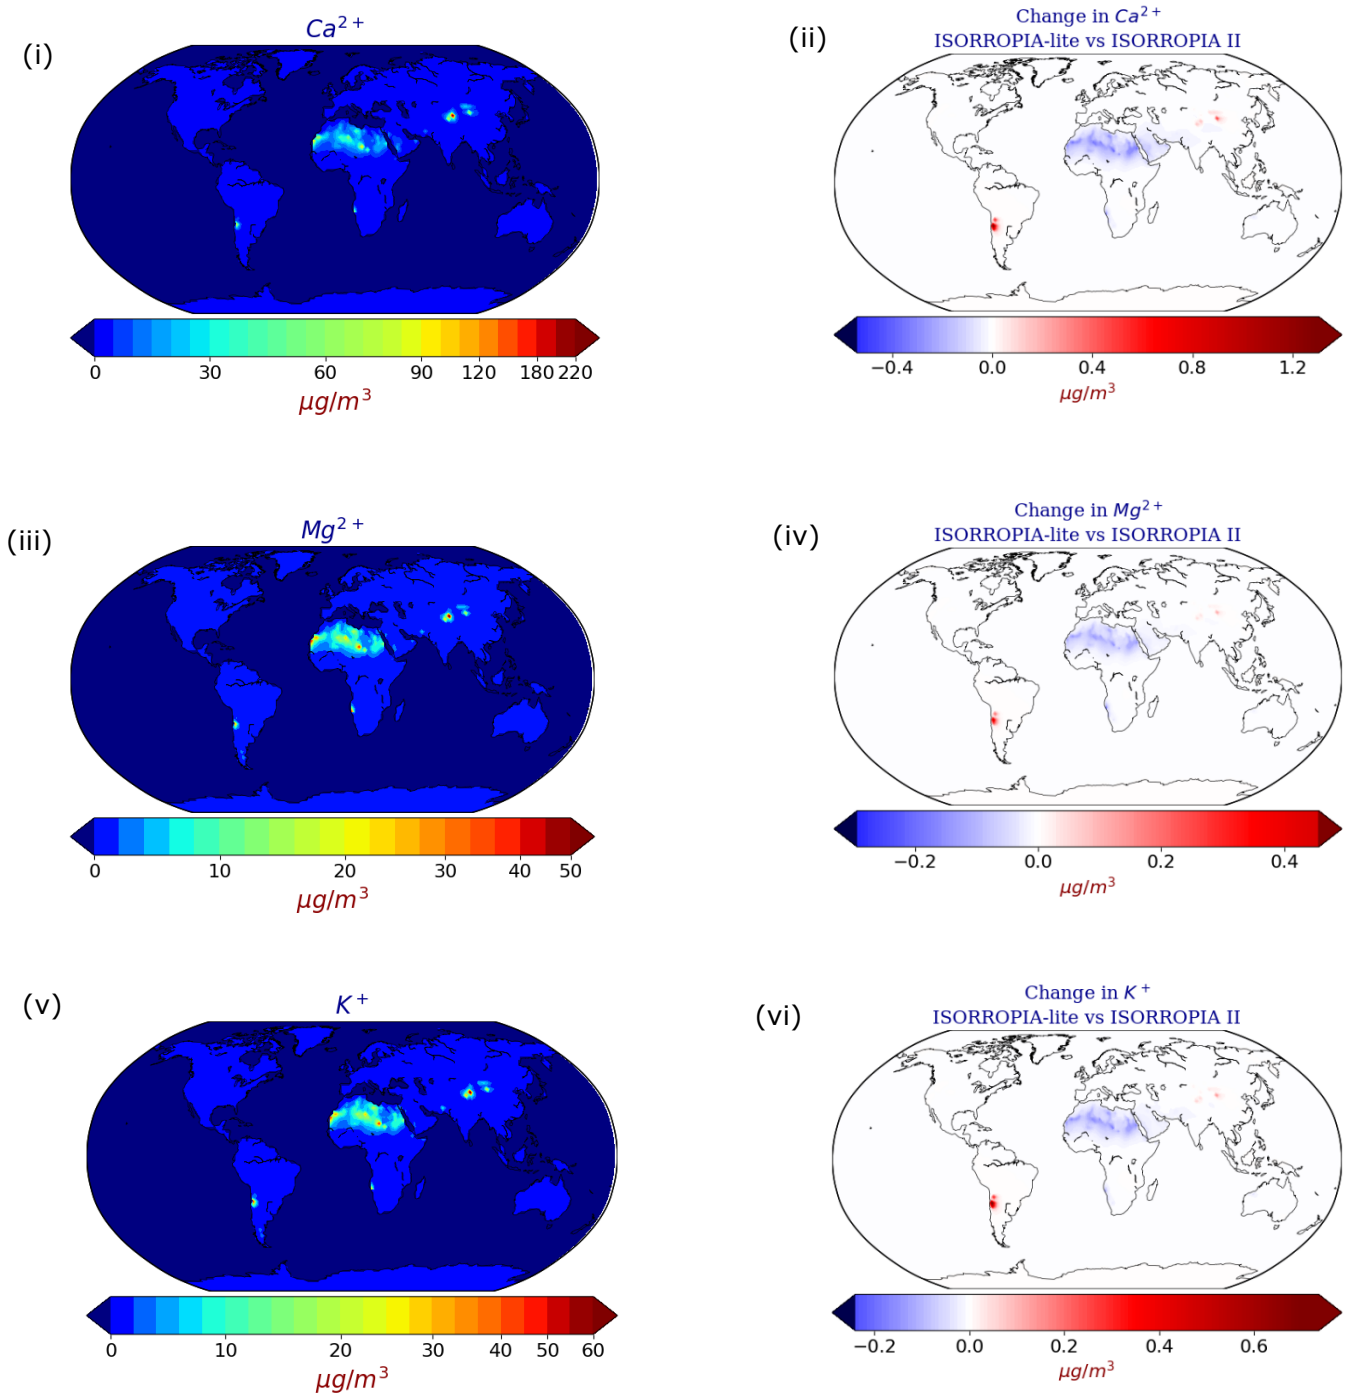

**Figure S4:** Annual mean surface concentrations of i)  $\text{Ca}^{2+}$ , ii)  $\text{Mg}^{2+}$  and iii)  $\text{K}^{+}$  in TSP as predicted by EMAC using ISORROPIA-lite. Change of the annual mean EMAC-simulated surface concentration of iv)  $\text{Ca}^{2+}$ , v)  $\text{Mg}^{2+}$  and vi)  $\text{K}^{+}$  in TSP after employing ISORROPIA II. Positive values in red indicate higher concentrations by ISORROPIA-lite. The models assume different aerosol states.

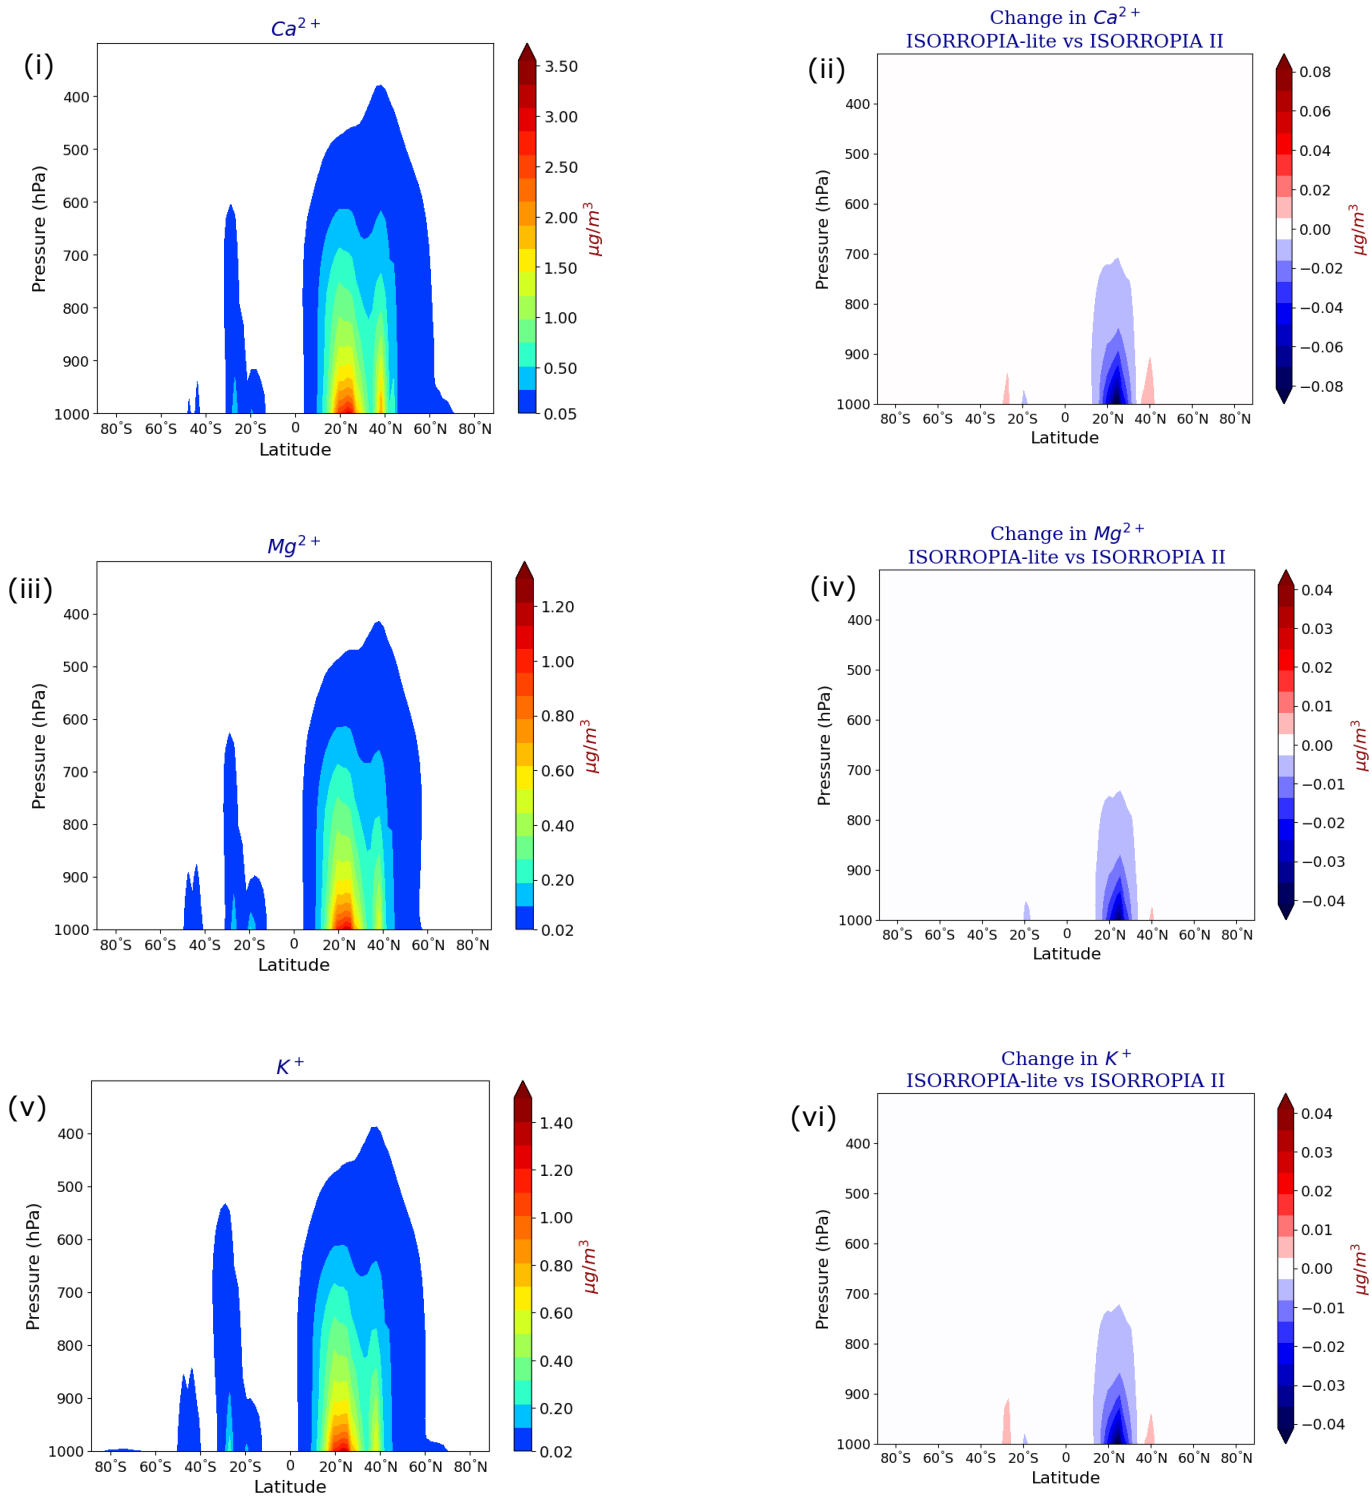

**Figure S5:** Annually averaged zonal concentrations of i) Ca<sup>2+</sup>, ii) Mg<sup>2+</sup> and iii) K<sup>+</sup> in TSP as predicted by EMAC using ISORROPIA-lite. Change of the annually averaged EMAC-simulated zonal concentration of iv) Ca<sup>2+</sup>, v) Mg<sup>2+</sup> and vi) K<sup>+</sup> in TSP after employing ISORROPIA II. Positive values in red indicate higher concentrations by ISORROPIA-lite. The models assume different aerosol states.

**Table S1:** Seasonal statistical evaluation of EMAC predicted surface concentrations of PM<sub>2.5</sub> SO<sub>4</sub><sup>2-</sup> using ISORROPIA II in stable mode against observations during 2010.

| <b>Network</b> | <b>Season</b> | <b>Number of datasets</b> | <b>Mean Observed</b><br>( $\mu\text{g m}^{-3}$ ) | <b>Mean Predicted</b><br>( $\mu\text{g m}^{-3}$ ) | <b>MAGE</b><br>( $\mu\text{g m}^{-3}$ ) | <b>MB</b><br>( $\mu\text{g m}^{-3}$ ) | <b>NME</b><br>(%) | <b>NMB</b><br>(%) | <b>RMSE</b><br>( $\mu\text{g m}^{-3}$ ) |
|----------------|---------------|---------------------------|--------------------------------------------------|---------------------------------------------------|-----------------------------------------|---------------------------------------|-------------------|-------------------|-----------------------------------------|
| EPA            | Winter        | 148                       | 2.15                                             | 1.08                                              | 1.11                                    | -1.06                                 | 51.73             | -49.52            | 1.57                                    |
|                | Spring        | 290                       | 1.99                                             | 1.68                                              | 0.57                                    | -0.31                                 | 28.52             | -15.44            | 0.73                                    |
|                | Summer        | 287                       | 2.64                                             | 1.18                                              | 1.48                                    | -1.46                                 | 55.88             | -55.33            | 1.76                                    |
|                | Autumn        | 294                       | 1.87                                             | 1.49                                              | 0.49                                    | -0.37                                 | 26.33             | -19.9             | 0.63                                    |
| IMPROVE        | Winter        | 116                       | 0.92                                             | 0.72                                              | 0.57                                    | -0.2                                  | 61.48             | -21.67            | 1.26                                    |
|                | Spring        | 233                       | 0.99                                             | 1.09                                              | 0.38                                    | 0.1                                   | 38.11             | 10.16             | 0.5                                     |
|                | Summer        | 193                       | 1.35                                             | 0.79                                              | 0.68                                    | -0.56                                 | 50.41             | -41.55            | 1.05                                    |
|                | Autumn        | 214                       | 0.94                                             | 0.99                                              | 0.31                                    | 0.04                                  | 33.1              | 4.61              | 0.42                                    |
| EMEP           | Winter        | 7                         | 2.82                                             | 1.74                                              | 1.08                                    | -1.08                                 | 38.28             | -38.28            | 1.42                                    |
|                | Spring        | 18                        | 1.62                                             | 1.2                                               | 0.75                                    | -0.42                                 | 46.52             | -25.74            | 0.88                                    |
|                | Summer        | 18                        | 2.24                                             | 1.15                                              | 1.09                                    | -1.09                                 | 48.62             | -48.44            | 1.28                                    |
|                | Autumn        | 17                        | 1.73                                             | 1.21                                              | 0.76                                    | -0.53                                 | 43.91             | -30.4             | 0.89                                    |
| EANET          | Winter        | 30                        | 3.72                                             | 1.27                                              | 2.68                                    | -2.45                                 | 72.04             | -65.83            | 4.0                                     |
|                | Spring        | 60                        | 3.79                                             | 1.77                                              | 2.3                                     | -2.02                                 | 60.73             | -53.34            | 3.42                                    |
|                | Summer        | 61                        | 2.66                                             | 1.38                                              | 1.56                                    | -1.28                                 | 58.7              | -48.17            | 2.15                                    |
|                | Autumn        | 61                        | 2.28                                             | 1.27                                              | 1.31                                    | -1.01                                 | 57.49             | -44.16            | 1.92                                    |

**Table S2:** Seasonal statistical evaluation of EMAC predicted surface concentrations of PM<sub>2.5</sub> NH<sub>4</sub><sup>+</sup> using ISORROPIA II in stable mode against observations during 2010.

| <b>Network</b> | <b>Season</b> | <b>Number of datasets</b> | <b>Mean Observed</b><br>( $\mu\text{g m}^{-3}$ ) | <b>Mean Predicted</b><br>( $\mu\text{g m}^{-3}$ ) | <b>MAGE</b><br>( $\mu\text{g m}^{-3}$ ) | <b>MB</b><br>( $\mu\text{g m}^{-3}$ ) | <b>NME</b><br>(%) | <b>NMB</b><br>(%) | <b>RMSE</b><br>( $\mu\text{g m}^{-3}$ ) |
|----------------|---------------|---------------------------|--------------------------------------------------|---------------------------------------------------|-----------------------------------------|---------------------------------------|-------------------|-------------------|-----------------------------------------|
| EPA            | Winter        | 137                       | 1.52                                             | 1.56                                              | 0.57                                    | 0.04                                  | 37.73             | 2.66              | 0.94                                    |
|                | Spring        | 269                       | 0.98                                             | 1.69                                              | 0.79                                    | 0.71                                  | 80.17             | 72.58             | 0.97                                    |
|                | Summer        | 265                       | 0.82                                             | 0.41                                              | 0.43                                    | -0.41                                 | 51.71             | -49.8             | 0.56                                    |
|                | Autumn        | 273                       | 0.65                                             | 0.55                                              | 0.19                                    | -0.11                                 | 29.33             | -16.39            | 0.29                                    |
| EMEP           | Winter        | 6                         | 2.07                                             | 2.8                                               | 0.84                                    | 0.74                                  | 40.56             | 35.63             | 1.27                                    |
|                | Spring        | 14                        | 1.24                                             | 2.17                                              | 0.99                                    | 0.93                                  | 79.77             | 74.9              | 1.19                                    |
|                | Summer        | 14                        | 0.84                                             | 0.43                                              | 0.41                                    | -0.41                                 | 48.61             | -48.61            | 0.45                                    |
|                | Autumn        | 13                        | 0.83                                             | 1.16                                              | 0.41                                    | 0.34                                  | 49.7              | 40.67             | 0.53                                    |
| EANET          | Winter        | 27                        | 1.39                                             | 1.38                                              | 0.94                                    | -0.02                                 | 67.29             | -1.12             | 1.81                                    |
|                | Spring        | 59                        | 1.07                                             | 1.7                                               | 1.22                                    | 0.63                                  | 114.5             | 58.75             | 1.78                                    |
|                | Summer        | 58                        | 0.69                                             | 0.56                                              | 0.33                                    | -0.14                                 | 47.43             | -19.85            | 0.47                                    |
|                | Autumn        | 58                        | 0.54                                             | 0.48                                              | 0.38                                    | -0.06                                 | 69.24             | -11.74            | 0.58                                    |



**Table S3:** Seasonal statistical evaluation of EMAC predicted surface concentrations of PM<sub>2.5</sub> NO<sub>3</sub><sup>-</sup> using ISORROPIA II in stable mode against observations during 2010.

| Network | Season | Number of datasets | Mean Observed (µg m <sup>-3</sup> ) | Mean Predicted (µg m <sup>-3</sup> ) | MAGE (µg m <sup>-3</sup> ) | MB (µg m <sup>-3</sup> ) | NME (%) | NMB (%) | RMSE (µg m <sup>-3</sup> ) |
|---------|--------|--------------------|-------------------------------------|--------------------------------------|----------------------------|--------------------------|---------|---------|----------------------------|
| EPA     | Winter | 144                | 2.82                                | 3.83                                 | 1.97                       | 1.01                     | 70.0    | 35.87   | 2.61                       |
|         | Spring | 291                | 1.41                                | 3.2                                  | 1.9                        | 1.79                     | 135.16  | 127.11  | 2.35                       |
|         | Summer | 280                | 0.5                                 | 0.28                                 | 0.28                       | -0.22                    | 55.11   | -44.42  | 0.69                       |
|         | Autumn | 290                | 0.66                                | 0.54                                 | 0.36                       | -0.12                    | 54.07   | -18.01  | 0.58                       |
| IMPROVE | Winter | 116                | 0.81                                | 2.16                                 | 1.41                       | 1.34                     | 173.76  | 164.76  | 1.77                       |
|         | Spring | 233                | 0.5                                 | 1.81                                 | 1.35                       | 1.32                     | 272.05  | 266.11  | 1.78                       |
|         | Summer | 193                | 0.2                                 | 0.29                                 | 0.18                       | 0.09                     | 89.7    | 48.07   | 0.25                       |
|         | Autumn | 214                | 0.21                                | 0.37                                 | 0.25                       | 0.16                     | 119.85  | 77.91   | 0.35                       |
| EMEP    | Winter | 7                  | 3.35                                | 5.27                                 | 2.81                       | 1.92                     | 83.9    | 57.38   | 4.13                       |
|         | Spring | 18                 | 1.63                                | 2.47                                 | 1.56                       | 0.83                     | 95.71   | 50.94   | 2.14                       |
|         | Summer | 18                 | 0.27                                | 0.58                                 | 0.43                       | 0.31                     | 158.9   | 114.1   | 0.63                       |
|         | Autumn | 17                 | 0.8                                 | 1.5                                  | 0.85                       | 0.7                      | 106.94  | 87.44   | 1.35                       |
| EANET   | Winter | 30                 | 2.03                                | 2.88                                 | 2.01                       | 0.85                     | 99.01   | 41.67   | 3.03                       |
|         | Spring | 59                 | 1.85                                | 2.43                                 | 1.97                       | 0.58                     | 106.59  | 31.6    | 3.05                       |
|         | Summer | 59                 | 0.63                                | 0.64                                 | 0.61                       | 0.01                     | 96.31   | 1.3     | 0.91                       |
|         | Autumn | 59                 | 0.77                                | 0.83                                 | 0.69                       | 0.06                     | 89.49   | 7.92    | 1.08                       |

**Table S4:** Seasonal statistical evaluation of EMAC predicted surface concentrations of PM<sub>2.5</sub> SO<sub>4</sub><sup>2-</sup> using ISORROPIA-lite against observations during 2010.

| Network | Season | Number of datasets | Mean Observed (µg m <sup>-3</sup> ) | Mean Predicted (µg m <sup>-3</sup> ) | MAGE (µg m <sup>-3</sup> ) | MB (µg m <sup>-3</sup> ) | NME (%) | NMB (%) | RMSE (µg m <sup>-3</sup> ) |
|---------|--------|--------------------|-------------------------------------|--------------------------------------|----------------------------|--------------------------|---------|---------|----------------------------|
| EPA     | Winter | 148                | 2.15                                | 1.05                                 | 1.14                       | -1.09                    | 52.91   | -50.9   | 1.59                       |
|         | Spring | 290                | 1.99                                | 1.68                                 | 0.57                       | -0.31                    | 28.53   | -15.67  | 0.73                       |
|         | Summer | 287                | 2.64                                | 1.19                                 | 1.47                       | -1.46                    | 55.7    | -55.16  | 1.75                       |
|         | Autumn | 294                | 1.87                                | 1.48                                 | 0.49                       | -0.38                    | 26.53   | -20.53  | 0.64                       |
| IMPROVE | Winter | 116                | 0.92                                | 0.7                                  | 0.57                       | -0.22                    | 61.55   | -24.25  | 1.26                       |
|         | Spring | 233                | 0.99                                | 1.09                                 | 0.38                       | 0.1                      | 38.04   | 9.99    | 0.49                       |
|         | Summer | 193                | 1.35                                | 0.79                                 | 0.68                       | -0.56                    | 50.32   | -41.67  | 1.04                       |
|         | Autumn | 214                | 0.94                                | 0.99                                 | 0.31                       | 0.04                     | 33.1    | 4.61    | 0.42                       |
| EMEP    | Winter | 7                  | 2.82                                | 1.72                                 | 1.1                        | -1.1                     | 39.06   | -39.06  | 1.44                       |
|         | Spring | 18                 | 1.62                                | 1.2                                  | 0.74                       | -0.42                    | 45.99   | -25.96  | 0.87                       |
|         | Summer | 18                 | 2.24                                | 1.15                                 | 1.1                        | -1.09                    | 48.93   | -48.83  | 1.29                       |
|         | Autumn | 17                 | 1.73                                | 1.2                                  | 0.77                       | -0.54                    | 44.58   | -30.91  | 0.91                       |
| EANET   | Winter | 30                 | 3.72                                | 1.24                                 | 2.7                        | -2.48                    | 72.49   | -66.6   | 4.03                       |
|         | Spring | 60                 | 3.79                                | 1.79                                 | 2.28                       | -1.99                    | 60.18   | -52.68  | 3.4                        |
|         | Summer | 61                 | 2.66                                | 1.38                                 | 1.56                       | -1.28                    | 58.74   | -48.13  | 2.15                       |
|         | Autumn | 61                 | 2.28                                | 1.28                                 | 1.3                        | -1.0                     | 57.08   | -43.97  | 1.91                       |

**Table S5:** Seasonal Statistical evaluation of EMAC predicted surface concentrations of PM<sub>2.5</sub> NH<sub>4</sub><sup>+</sup> using ISORROPIA-lite against observations during 2010.

| <b>Network</b> | <b>Season</b> | <b>Number of datasets</b> | <b>Mean Observed</b><br>( $\mu\text{g m}^{-3}$ ) | <b>Mean Predicted</b><br>( $\mu\text{g m}^{-3}$ ) | <b>MAGE</b><br>( $\mu\text{g m}^{-3}$ ) | <b>MB</b><br>( $\mu\text{g m}^{-3}$ ) | <b>NME</b><br>(%) | <b>NMB</b><br>(%) | <b>RMSE</b><br>( $\mu\text{g m}^{-3}$ ) |
|----------------|---------------|---------------------------|--------------------------------------------------|---------------------------------------------------|-----------------------------------------|---------------------------------------|-------------------|-------------------|-----------------------------------------|
| EPA            | Winter        | 137                       | 1.52                                             | 1.54                                              | 0.56                                    | 0.02                                  | 37.09             | 1.47              | 0.93                                    |
|                | Spring        | 269                       | 0.98                                             | 1.72                                              | 0.8                                     | 0.74                                  | 81.38             | 74.93             | 0.98                                    |
|                | Summer        | 265                       | 0.82                                             | 0.42                                              | 0.42                                    | -0.4                                  | 50.71             | -48.66            | 0.56                                    |
|                | Autumn        | 273                       | 0.65                                             | 0.58                                              | 0.19                                    | -0.07                                 | 29.08             | -10.72            | 0.28                                    |
| EMEP           | Winter        | 6                         | 2.07                                             | 2.77                                              | 0.82                                    | 0.71                                  | 39.47             | 34.09             | 1.25                                    |
|                | Spring        | 14                        | 1.24                                             | 1.97                                              | 0.84                                    | 0.73                                  | 67.16             | 58.72             | 1.02                                    |
|                | Summer        | 14                        | 0.84                                             | 0.46                                              | 0.38                                    | -0.38                                 | 44.76             | -44.76            | 0.42                                    |
|                | Autumn        | 13                        | 0.83                                             | 1.18                                              | 0.43                                    | 0.35                                  | 51.57             | 42.76             | 0.54                                    |
| EANET          | Winter        | 27                        | 1.39                                             | 1.35                                              | 0.93                                    | -0.05                                 | 66.56             | -3.36             | 1.81                                    |
|                | Spring        | 59                        | 1.07                                             | 1.56                                              | 1.07                                    | 0.49                                  | 100.22            | 45.52             | 1.63                                    |
|                | Summer        | 58                        | 0.69                                             | 0.59                                              | 0.32                                    | -0.1                                  | 45.81             | -14.62            | 0.46                                    |
|                | Autumn        | 58                        | 0.54                                             | 0.52                                              | 0.37                                    | -0.02                                 | 67.43             | -4.4              | 0.56                                    |

**Table S6:** Seasonal statistical evaluation of EMAC predicted surface concentrations of PM<sub>2.5</sub> NO<sub>3</sub><sup>-</sup> using ISORROPIA-lite against observations during 2010.

| Network | Season | Number of datasets | Mean Observed (µg m <sup>-3</sup> ) | Mean Predicted (µg m <sup>-3</sup> ) | MAGE (µg m <sup>-3</sup> ) | MB (µg m <sup>-3</sup> ) | NME (%) | NMB (%) | RMSE (µg m <sup>-3</sup> ) |
|---------|--------|--------------------|-------------------------------------|--------------------------------------|----------------------------|--------------------------|---------|---------|----------------------------|
| EPA     | Winter | 144                | 2.82                                | 3.76                                 | 1.91                       | 0.94                     | 67.68   | 33.49   | 2.54                       |
|         | Spring | 291                | 1.41                                | 3.26                                 | 1.96                       | 1.85                     | 139.4   | 131.61  | 2.36                       |
|         | Summer | 280                | 0.5                                 | 0.29                                 | 0.27                       | -0.21                    | 54.12   | -41.95  | 0.69                       |
|         | Autumn | 290                | 0.66                                | 0.63                                 | 0.38                       | -0.03                    | 56.94   | -4.81   | 0.6                        |
| IMPROVE | Winter | 116                | 0.81                                | 2.15                                 | 1.41                       | 1.34                     | 172.65  | 164.36  | 1.74                       |
|         | Spring | 233                | 0.5                                 | 1.86                                 | 1.39                       | 1.36                     | 279.62  | 275.01  | 1.79                       |
|         | Summer | 193                | 0.2                                 | 0.3                                  | 0.18                       | 0.1                      | 92.3    | 53.19   | 0.26                       |
|         | Autumn | 214                | 0.21                                | 0.42                                 | 0.28                       | 0.21                     | 137.09  | 102.38  | 0.39                       |
| EMEP    | Winter | 7                  | 3.35                                | 5.22                                 | 2.79                       | 1.87                     | 83.37   | 55.94   | 4.09                       |
|         | Spring | 18                 | 1.63                                | 2.55                                 | 1.58                       | 0.92                     | 96.88   | 56.11   | 2.1                        |
|         | Summer | 18                 | 0.27                                | 0.64                                 | 0.48                       | 0.37                     | 174.65  | 134.53  | 0.69                       |
|         | Autumn | 17                 | 0.8                                 | 1.6                                  | 0.92                       | 0.8                      | 115.23  | 100.3   | 1.42                       |
| EANET   | Winter | 30                 | 2.03                                | 2.88                                 | 2.01                       | 0.85                     | 98.65   | 41.9    | 3.03                       |
|         | Spring | 59                 | 1.85                                | 2.38                                 | 1.9                        | 0.53                     | 103.14  | 28.86   | 2.98                       |
|         | Summer | 59                 | 0.63                                | 0.69                                 | 0.64                       | 0.06                     | 100.43  | 8.81    | 0.95                       |
|         | Autumn | 59                 | 0.77                                | 0.87                                 | 0.69                       | 0.1                      | 89.82   | 13.14   | 1.08                       |
